# Supplementary material
Source: MDPI journal article supplement (https://www.mdpi.com/2073-4441/14/4/540)
Supplement: s1 [file s1]

Supplementary Information

# Changes in Wastewater Treatment Performance and Microbial Community during Bioaugmentation of a Denitrifying *Pseudomonas* Strain in the Low Carbon–Nitrogen Ratio Sequencing Batch Reactor

Tianyuan Chen <sup>1,2</sup>, Xiaoyong Yang <sup>1</sup>, Qian Sun <sup>1</sup>, Anyi Hu <sup>1</sup>, Dan Qin <sup>1</sup>, Jiangwei Li <sup>1</sup>, Yinhan Wang <sup>3</sup> and Chang-Ping Yu <sup>1,4,\*</sup>

<sup>1</sup> CAS Key Laboratory of Urban Pollutant Conversion, Institute of Urban Environment, Chinese Academy of Sciences, Xiamen, Fujian 361021, China

<sup>2</sup> University of Chinese Academy of Sciences, Beijing 100049, China

<sup>3</sup> Xiamen Institute of Rare Earth Materials, Haixi Institutes, Chinese Academy of Sciences

<sup>4</sup> Graduate Institute of Environmental Engineering, National Taiwan University, Taipei 106, Taiwan

\* Correspondence: cpyu@iue.ac.cn (CP Yu.), qsun@iue.ac.cn (Q Sun)

## Contents

**Table S1.** Primers for functional genes.

**Table S2.** Nitrite removal capacity of JMSTP.

**Figure S1.** The result of PCR sequencing analysis of *nirS*, *norB*, and *nosZ*.

**Table S3.** Community richness and diversity indices of two reactors.

**Table S4.** OTUs of two reactors at each sampling day during experiment.

**Text S1.** SEM operation process.

**Table S1.** Primers for functional genes.

| Gene name    | Primer name | Primer genetic sequence |
|--------------|-------------|-------------------------|
| <i>qnorB</i> | qnorB2F     | GGNCAYCARGGNTAYGA       |
|              | qnorB5R     | ACCCANAGRTGNACNACCCACCA |
| <i>cnorB</i> | cnorB2F     | GACAAGNNNTACTGGTGGT     |
|              | cnorB6R     | GAANCCCCANACNCCNGC      |
| <i>nirS</i>  | cd3aF       | GTSAACGTSAAGGARACSGG    |
|              | R3cd        | GASTTCGGRTGSGTCTTGA     |
| <i>nirK</i>  | F1aCu       | ATCATGGTSCTGCCGCG       |
|              | R3Cu        | GCCTCGATCAGRTTGTGGTT    |
| <i>nosZ</i>  | nosZ2F      | CGCRACGGCAASAAGGTSMSSGT |
|              | nosZ2R      | CAKRTGCAKSGCRTCAGAA     |

Note: N=A, C, G, or T; Y=C or T; R=A or G; D=G, A, or T; S=C or G

**Table S2.** Nitrite removal capacity of JMSTP.

| Time | TN (mg/L) |
|------|-----------|
| 0 h  | 104       |
| 12 h | 2.71      |
| 24 h | 0.00      |

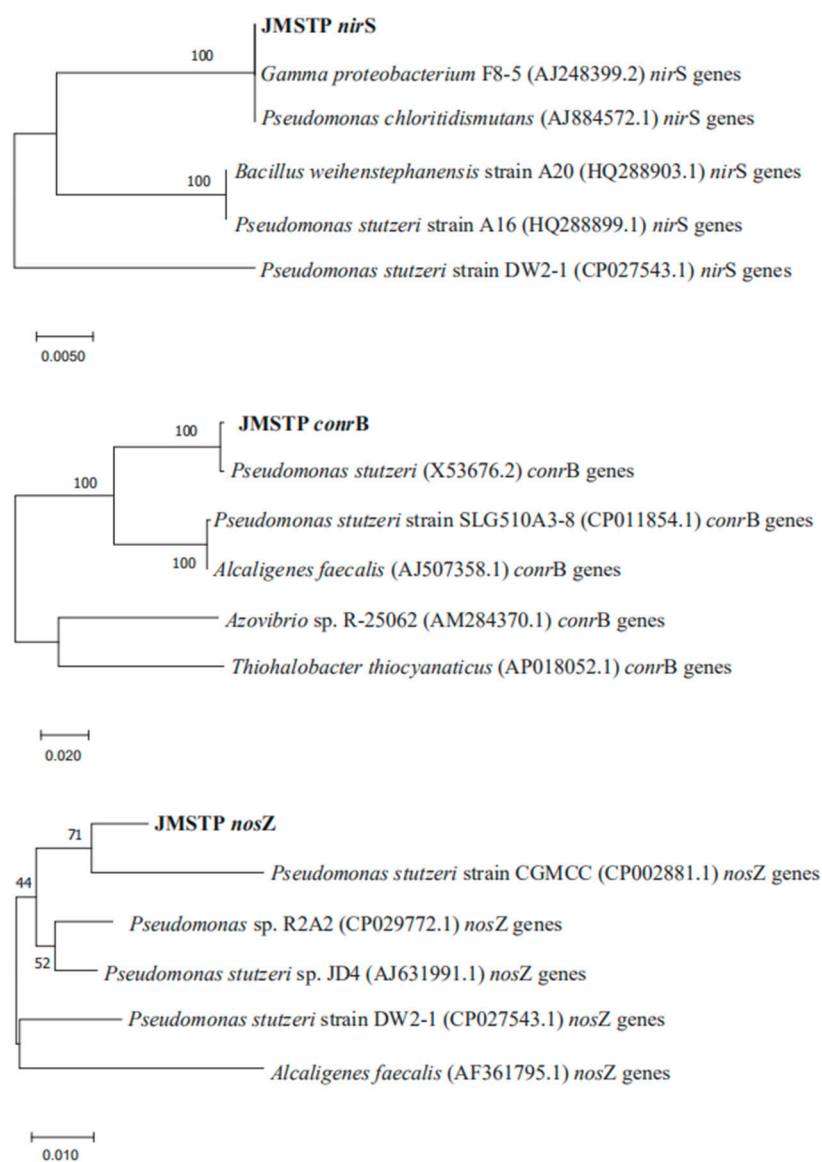

**Figure S1.** The result of PCR sequencing analysis of *nirS*, *conrB*, and *nosZ*.

**Table S3.** Community richness and diversity indices of two reactors.

| SBR     | Time<br>(day) | richness | Shan<br>non | Simp<br>son | Pie<br>lou | chao1    | ace      | Goods<br>coverage |
|---------|---------------|----------|-------------|-------------|------------|----------|----------|-------------------|
| JMSTP   | B1            | 1196     | 3.180       | 0.884       | 0.449      | 1436.384 | 1468.138 | 0.997             |
|         | D1_1          | 1222     | 3.017       | 0.815       | 0.424      | 1447.822 | 1464.672 | 0.997             |
|         | D1_2          | 1329     | 3.251       | 0.855       | 0.452      | 1575.224 | 1612.856 | 0.997             |
|         | D1_3          | 1346     | 3.257       | 0.878       | 0.452      | 1587.954 | 1632.217 | 0.997             |
|         | B2            | 1035     | 2.960       | 0.855       | 0.426      | 1245.118 | 1261.835 | 0.997             |
|         | D2_1          | 872      | 2.342       | 0.770       | 0.346      | 1047.579 | 1097.753 | 0.998             |
|         | D2_2          | 909      | 2.831       | 0.855       | 0.416      | 1095.121 | 1132.869 | 0.998             |
|         | D2_3          | 1021     | 2.940       | 0.866       | 0.424      | 1244.256 | 1277.987 | 0.997             |
|         | D2_4          | 1059     | 2.993       | 0.879       | 0.430      | 1315.800 | 1377.675 | 0.997             |
|         | D2_5          | 1044     | 2.996       | 0.877       | 0.431      | 1232.894 | 1268.973 | 0.997             |
|         | D2_6          | 1008     | 2.918       | 0.870       | 0.422      | 1236.331 | 1260.837 | 0.997             |
|         | D2_7          | 905      | 2.664       | 0.838       | 0.391      | 1067.958 | 1120.398 | 0.998             |
| Control | B1            | 1363     | 3.549       | 0.924       | 0.492      | 1602.963 | 1639.270 | 0.997             |
|         | D1_1          | 1205     | 3.240       | 0.901       | 0.457      | 1424.290 | 1453.056 | 0.997             |
|         | D1_2          | 1262     | 3.326       | 0.908       | 0.466      | 1485.523 | 1528.443 | 0.997             |
|         | D1_3          | 1255     | 3.363       | 0.909       | 0.471      | 1473.284 | 1491.122 | 0.997             |
|         | B2            | 1053     | 2.947       | 0.869       | 0.423      | 1252.976 | 1298.123 | 0.997             |
|         | D2_1          | 968      | 2.847       | 0.866       | 0.414      | 1122.214 | 1178.422 | 0.998             |
|         | D2_2          | 959      | 2.727       | 0.836       | 0.397      | 1149.821 | 1215.670 | 0.997             |
|         | D2_3          | 1012     | 2.906       | 0.876       | 0.420      | 1191.338 | 1237.947 | 0.997             |
|         | D2_4          | 971      | 2.935       | 0.880       | 0.427      | 1155.816 | 1200.821 | 0.998             |
|         | D2_5          | 1007     | 2.859       | 0.868       | 0.414      | 1226.032 | 1262.518 | 0.997             |
|         | D2_6          | 898      | 2.794       | 0.869       | 0.411      | 1116.765 | 1145.560 | 0.997             |
|         | D2_7          | 810      | 2.758       | 0.866       | 0.412      | 977.270  | 1001.921 | 0.998             |

**Table S4.** OTUs of two reactors at each sampling day during experiment.

| Sample name | Number (percentage possession) |             |             |
|-------------|--------------------------------|-------------|-------------|
|             | A                              | B           | C           |
| B1          | 384 (22.0%)                    | 551 (31.5%) | 812 (46.5%) |
| D1_1        | 430 (26.3%)                    | 413 (25.3%) | 792 (48.4%) |
| D1_2        | 495 (28.2%)                    | 428 (24.4%) | 834 (47.5%) |
| D1_3        | 496 (28.3%)                    | 405 (23.1%) | 850 (48.5%) |
| B2          | 388 (26.9%)                    | 406 (28.2%) | 647 (44.9%) |
| D2_1        | 326 (25.2%)                    | 422 (32.6%) | 546 (42.2%) |
| D2_2        | 365 (27.6%)                    | 415 (31.3%) | 544 (41.1%) |
| D2_3        | 386 (27.6%)                    | 377 (27.0%) | 635 (45.4%) |
| D2_4        | 437 (31.0%)                    | 349 (24.8%) | 622 (44.2%) |
| D2_5        | 418 (29.3%)                    | 381 (26.7%) | 626 (43.9%) |
| D2_6        | 450 (33.4%)                    | 340 (25.2%) | 558 (41.4%) |
| D2_7        | 405 (33.3%)                    | 310 (25.5%) | 500 (41.2%) |

Note: Part (A) represents the unique number of OTUs in the JMSTP SBR, part (B) represents the unique number of OTUs in the control SBR, and the overlapping zone (C) represents the same OTUs in the two SBRs.

**Text S1.** SEM operation process.

SEM operation process:

- (1) The microorganism was cleaned twice with 0.1M phosphate buffer solution (PBS), fixed with 2.5% glutaraldehyde for 4 hours, and then cleaned twice with 0.1M PBS;
- (2) The samples were dehydrated by gradient with 30%, 50%, 70%, 80% and 90% ethanol solutions respectively. At last, the samples were dehydrated by 100% ethanol twice, each step lasted for 10 minutes;
- (3) After adding 100% ethanol for the second time, the sample is subjected to critical point drying, which takes one day;
- (4) After drying, the sample is pasted on the sample table with conductive adhesive, and then the machine is tested after spraying gold.
